1 **Prevalence and Time of Diagnosis of Endometriosis across Racial and Ethnic Groups in the**  
2 **US**

3  
4 Rui Li, Ph.D.,<sup>a</sup> Donna A Kreher, Ph.D.,<sup>b,c</sup> Ashley L Gubbels, M.D.,<sup>c</sup> Amy R Benjamin, M.D.<sup>c</sup>

5  
6 <sup>a</sup> Department of Public Health Sciences, University of Rochester Medical Center, Rochester NY,  
7 USA

8 <sup>b</sup> Department of Psychiatry, University of Rochester Medical Center, Rochester, New York,  
9 USA

10 <sup>c</sup> Department of Obstetrics and Gynecology, University of Rochester Medical Center, Rochester  
11 NY, USA

12  
13 **\*Corresponding to:** Rui Li, PhD, Department of Public Health Sciences, University of  
14 Rochester Medical Center, 265 Crittenden Blvd, Rochester, NY 14642, USA  
15 Phone: (585)-623-3592

16 Email: [rui\\_li@urmc.rochester.edu](mailto:rui_li@urmc.rochester.edu)

17  
18 **Funding:** This research did not receive any specific grant from funding agencies in the public,  
19 commercial, or not-for-profit sectors. The authors have no conflicts of interest to declare.

20

21

22

23

1 **Abstract**

2 *Background:* Endometriosis is associated with substantial adverse health and psychosocial  
3 consequences. However, the prevalence of endometriosis across different racial and ethnic  
4 groups in the US has not been established and to what extent the difference in prevalence might  
5 be associated with systemic barriers to receiving the diagnosis is unknown. We aimed to estimate  
6 the prevalence of endometriosis across different racial and ethnic groups and examine the  
7 association between race/ethnicity and the time of diagnosis.

8 *Methods:* Using cross-sectional data from the National Health and Nutrition Examination Survey  
9 1999-2006, we estimated race/ethnicity-specific prevalence of self-reported diagnosis of  
10 endometriosis among 5,557 women aged 20-54 years. Multivariable generalized linear  
11 regression model examined the association between race/ethnicity and the age of endometriosis  
12 diagnosis, accounting for socioeconomic indicators, health insurance, lifestyle and reproductive  
13 characteristics.

14 *Results:* Endometriosis was prevalent in 9.0% overall, 11.1% among non-Hispanic white, 5.8%  
15 among non-Hispanic black, 2.7% among Hispanic, and 6.4% among the other racial and ethnic  
16 groups combined. The mean age of endometriosis diagnosis was 29.0 years (range 13-52).  
17 Compared with non-Hispanic white, non-Hispanic black women were diagnosed on average at  
18 2.6 years older (95% confidence interval [CI], 0.5-4.6), Hispanic women 3.8 years older (95% CI,  
19 1.5-6.2), and women in the other group 1.0 years younger (95% CI, -4.6 to 2.5).

20 *Conclusions:* Prevalence of endometriosis varied across different racial and ethnic groups.  
21 Among women with a diagnosis of endometriosis, black and Hispanic women were diagnosed at  
22 older ages than non-Hispanic white women. Future research is needed to determine whether such  
23 age disparity in endometriosis diagnosis persists.

1 **Keywords:** Diagnosis, diagnostic bias, disparity, endometriosis, ethnicity, prevalence, race

2

### 3 **Introduction**

4 Endometriosis is a chronic gynecological condition characterized by the presence of tissue  
5 with the histologic appearance of endometrial glands and stroma outside of the endometrial  
6 cavity, which often causes dysmenorrhea, dyspareunia, chronic pelvic pain, and is often  
7 associated with infertility (Howard, 2009). It is suggested to be prevalent in about 10% of  
8 women of reproductive age (Shafir et al., 2018). With \$12,118 direct cost and \$15,737 indirect  
9 cost per patient per year, the economic toll of endometriosis is highest in the United States (US)  
10 (Ahmed M. Soliman, Yang, Du, Kelley, & Winkel, 2016). A few studies have estimated the  
11 prevalence of endometriosis among reproductive-aged women in the US, although these  
12 estimates may not be an accurate reflection of the nationwide prevalence due to study design  
13 limitations such as endometriosis assessment method and self-selection into online survey  
14 (Bernuit et al., 2011; Fuldeore & Soliman, 2017; Kjerulff, Erickson, & Langenberg, 1996).  
15 Importantly, the prevalence of endometriosis within various racial and ethnic groups in the US is  
16 still unknown despite the conclusion from a recent systematic review that Black and Hispanic  
17 women were less likely to be diagnosed with endometriosis than white women (Bougie, Yap,  
18 Sikora, Flaxman, & Singh, 2019).

19 Disparity in endometriosis diagnosis may contribute to the commonly believed and observed  
20 lower prevalence of endometriosis among nonwhite women. Such racial disparity could be due  
21 in part to socioeconomic factors such as access to health care, as the diagnosis of endometriosis  
22 is usually preceded by multiple clinical visits sometimes between numerous providers, and  
23 requires laparoscopic confirmation. Extant literature suggests that the delay from symptom onset

1 to the diagnosis of endometriosis ranges from 4-11 years (Agarwal et al., 2019; Nnoaham et al.,  
2 2011; A. M. Soliman, Fuldeore, & Snabes, 2017), with significant delay even in countries with  
3 universal health care (Hudelist et al., 2012; Staal, van der Zanden, & Nap, 2016). In the US  
4 where the health care systems are largely segregated and the health care resources are unevenly  
5 distributed across different socioeconomic strata (Fiscella & Williams, 2004; Ko, Needleman,  
6 Derose, Laugesen, & Ponce, 2014; Smith, 2005), women of different racial and ethnic  
7 backgrounds may face different levels of challenges on their path to the diagnosis of  
8 endometriosis. However, there has been little research in the experiences of the diagnosis of  
9 endometriosis in general, with even less research focusing on the experiences of racial and ethnic  
10 minorities.

11 In addition to socioeconomic factors, diagnostic biases may also play a role in explaining for  
12 the racial disparity in the diagnosis. Endometriosis has historically been depicted as a disease of  
13 white and affluent women who tend to postpone childbearing and is believed to be rare among  
14 nonwhite women (Blinick & Merendino, 1951; Meigs, 1938; Scott & Te Linde, 1950). This  
15 notion originated from patient observations among clinics that mainly served patients with  
16 private insurance and/or white women (Blinick & Merendino, 1951; Gibson & Jung, 2005), and  
17 is bolstered by the prevalence data that suggest a lower prevalence of endometriosis among  
18 nonwhite women (Bougie, Yap, et al., 2019; Fuldeore & Soliman, 2017; Mowers et al., 2016;  
19 Nnoaham et al., 2011). However, these prevalence estimates only provide a snapshot view of  
20 endometriosis presence among populations and fail to take into account the diagnostic process.  
21 The prevailing notion of white predominance of the disease may perpetuate the diagnostic bias in  
22 medical professionals, which is evidenced by the observation that 40% of African-American  
23 women with a laparoscopic evidence of endometriosis were previously misdiagnosed with pelvic

1 inflammatory disease (Chatman, 1976). To date, to what extent the seemingly lower prevalence  
2 of endometriosis among nonwhite women is attributed to potential diagnostic biases remains  
3 unknown, impeding the goal of early diagnosis and quality care of endometriosis among  
4 minority female populations.

5 To gain a better understanding of both the epidemiology and diagnosis of endometriosis  
6 across different racial and ethnic groups in the US, we estimated the race and ethnicity-specific  
7 prevalence of endometriosis among US women of reproductive age and further examined the  
8 association between race/ethnicity and the age of endometriosis diagnosis, using data from the  
9 National Health and Nutrition Examination Survey (NHANES). We examined this association  
10 by conditioning on socioeconomic, lifestyle, and reproductive characteristics, so that the  
11 difference found across racial and ethnic groups in the age of diagnosis could potentially reflect  
12 racially and/or ethnically-related diagnostic biases for endometriosis.

13

## 14 **Methods**

### 15 *Data Source*

16 We used publicly available data from the NHANES, a cross-sectional study that uses a  
17 complex, multistage, probability sampling design to survey a nationally representative sample of  
18 about 10,000 noninstitutionalized US residents in 2-year cycles (Centers for Disease Control and  
19 Prevention (CDC). National Center for Health Statistics (NCHS).). NHANES interview data  
20 include demographic, socioeconomic, dietary, and health-related questions. Participants are  
21 interviewed by trained technicians using standardized questionnaires and methods, which  
22 ensures rigorous interview standards and high data quality. We used combined data from the  
23 1999-2000, 2001-2002, 2003-2004 and 2005-2006 NHANES cycles because questions regarding

1 endometriosis were asked during these cycles. Response rates of NHANES 1999-2006 ranged  
2 between 76–80%. Since we used publicly available deidentified data, the university Institutional  
3 Review Board exempted the current study from review (STUDY00005239).

4

#### 5 *Study Population*

6 For estimating the prevalence of endometriosis, our study population consisted of women  
7 aged between 20-54 years who participated in NHANES 1999-2006 and completed the  
8 reproductive health questionnaire in which they gave answers to the endometriosis questions.  
9 From 1999-2006, NHANES oversampled non-Hispanic black and Mexican-American  
10 individuals. Over 85% of the Hispanic participants were Mexican-American individuals. For  
11 examining the association between race/ethnicity and the age of endometriosis diagnosis, the  
12 study population were women who reported ever receiving a diagnosis of endometriosis and  
13 gave information regarding the age of diagnosis.

14

#### 15 *Measurement*

16 Endometriosis was ascertained from the reproductive health questionnaire in which women  
17 were asked “Has a doctor or other health professional ever told you that you had endometriosis?”.  
18 Women who answered *yes* to this question were further asked “How old were you when you  
19 were first told you had endometriosis?” with the age of diagnosis measured in years.

20 The race/ethnicity variable was derived by combining responses to questions on race and  
21 Hispanic origin. Respondents who self-identified as “Mexican American” or “Other Hispanic”  
22 were coded as being Hispanic. All other non-Hispanic participants were categorized based on

1 their self-reported races: non-Hispanic white, non-Hispanic black, and other non-Hispanic race  
2 including non-Hispanic multiracial.

3 Covariates for examining the association between race/ethnicity and age of endometriosis  
4 diagnosis included socioeconomic indicators which may affect both the incidence of  
5 endometriosis and the access to health care, and lifestyle and reproductive characteristics which  
6 primarily influence the risk of endometriosis incidence. Many of these variables potentially lie  
7 on the causal pathway between race/ethnicity and age of endometriosis diagnosis; by accounting  
8 for these variables we were able to disentangle the effect of race/ethnicity on the time of  
9 diagnosis that is independent of socioeconomic status (including access to health care), lifestyles,  
10 and reproductive factors.

11 Socioeconomic indicators included education attainment (less than high school, high school  
12 diploma, and more than high school), family income-to-poverty ratio which ranged from 0-5  
13 with 0 indicating no income and 5 indicating  $\geq 5$  times the federal poverty level, and type of  
14 health insurance (private insurance, public insurance including Medicaid/CHIP and other  
15 government insurance, and uninsured). Lifestyle variables included smoking history and body  
16 mass index (BMI). For smoking history, we created a binary variable indicating whether women  
17 started regular smoking before the age of 18 years. We chose this cutoff because the majority of  
18 smokers started smoking before 18 (U.S. Department of Health and Human Services, 2012) and  
19 also to minimize the reversal effect of a diagnosis of endometriosis on smoking. For BMI, we  
20 used women's self-reported current height and maximum lifetime weight (not including weight  
21 during pregnancy) to construct a variable of maximum lifetime BMI ( $\text{kg}/\text{m}^2$ ), which was further  
22 categorized into  $<25 \text{ kg}/\text{m}^2$ ,  $25\text{--}29.9 \text{ kg}/\text{m}^2$ ,  $\geq 30 \text{ kg}/\text{m}^2$ . Reproductive characteristics included  
23 age of menarche (years), parity (parous or not), and history of birth control pills use. For birth

1 control pills use, we calculated the duration (years) of use prior to the diagnosis of endometriosis  
2 in the following way: for women who did not report taking any birth control pills or initiated  
3 birth control pills after the diagnosis of endometriosis, their duration of use was 0; for women  
4 who initiated birth control pills prior to the diagnosis of endometriosis, their duration of use was  
5 calculated as either the total years of birth control pills use if they stopped prior to the diagnosis  
6 of endometriosis, or the age of endometriosis diagnosis minus the age of birth control pills  
7 initiation if they continued the use after the diagnosis of endometriosis.

8

### 9 *Statistical Analyses*

10 We calculated cycle-specific prevalence of endometriosis, accounting for the complex  
11 sample design by applying cycle-specific sampling weights and sample design variables. We  
12 then calculated the pooled overall prevalence as well as the prevalence for different racial and  
13 ethnic groups from 1999-2006 using calibrated sample weights and sample design variables  
14 (Centers for Disease Control and Prevention (CDC). National Center for Health Statistics  
15 (NCHS).)

16 We compared the mean age of endometriosis diagnosis by racial and ethnic groups,  
17 socioeconomic, lifestyle, and reproductive characteristics using the classical analysis of variance  
18 (ANOVA) when the assumption of homogenous variance was met or Welch's ANOVA when  
19 this assumption was violated (Welch, 1951). To facilitate comparison across categories, we  
20 categorized family income-to-poverty ratio into <1.00, 1.00-1.99, 2.00-4.99, and 5.00-highest;  
21 age of menarche into 8-11, 12-13, and 14-17 years; and years of birth control pills use into none,  
22 < 5 years, and  $\geq 5$  years, and reported the mean age of diagnosis for each category.



1 To examine the association between race/ethnicity and age of endometriosis diagnosis, we  
2 conducted a generalized multivariable linear regression model, adjusting for socioeconomic,  
3 lifestyle, and reproductive factors, so that the association observed between race/ethnicity and  
4 age of endometriosis diagnosis could potentially reflect the difference due to the diagnostic bias.  
5 Data management and statistical analyses were conducted in SAS 9.4 (SAS Inc., Cary, NC,  
6 USA).

## 7 8 **Results**

9 The flowchart for sample selection is presented in Figure 1. Out of 41,474 NHANES  
10 participants 1999–2006, 6,508 were women aged 20-54 years and 95.4% of them completed the  
11 reproductive health questionnaire among whom 89.5% had information regarding whether they  
12 had been diagnosed of endometriosis. From 1999–2006, the prevalence of endometriosis ranged  
13 between 8.1% and 9.4% (Table 1), with a pooled prevalence of 9.0%. The prevalence was  
14 highest among non-Hispanic white women (11.1%) and lowest among Hispanic women (2.7%).

15 Among the 380 women who reported having a diagnosis of endometriosis, age of diagnosis  
16 was available for 375 of them. As shown in Table 2, the mean age of diagnosis was 29 years. A  
17 later diagnosis of endometriosis was seen among black and Hispanic women, women with a high  
18 school degree, women without health insurance, women with family income below the poverty  
19 line, women who did not smoke and who had a higher BMI, women who had a later age of  
20 menarche, who were parous and who reported the longest duration of birth control pills use prior  
21 to the diagnosis of endometriosis.

22 Adjusting for socioeconomic, lifestyle, and reproductive factors, there was a statistically  
23 significant difference in the age of endometriosis diagnosis across different racial and ethnic

1 groups (Table 3). Compared with non-Hispanic white women, non-Hispanic black women were  
2 on average diagnosed of endometriosis 2.62 years later and Hispanic women were diagnosed  
3 3.85 years later. Women identifying as “Other” were diagnosed slightly earlier but the difference  
4 was not significant. In this adjusted model, income-to-poverty ratio, being parous, and years on  
5 birth control pills were also significant predictors of age of endometriosis diagnosis. Particularly,  
6 parous women were diagnosed of endometriosis 7 years later than nulliparous women.

7

## 8 **Discussion**

9 In this large, nationally representative sample of US women of reproductive age surveyed  
10 between 1999-2006, the prevalence of self-reported diagnosis of endometriosis was 9.0%,  
11 consistent with the commonly quoted 10% prevalence. The prevalence was highest among non-  
12 Hispanic white women and lowest among Hispanic women. Accounting for socioeconomic,  
13 lifestyle, and reproductive characteristics, non-Hispanic women were diagnosed with  
14 endometriosis at 2.6 years older, and Hispanic women at 3.8 years older, compared with non-  
15 Hispanic white women.

16 This study is among the few to estimate the prevalence of endometriosis in the US. Our  
17 national prevalence estimate of 9% is higher than the 12-month prevalence of 6.9% reported by  
18 Kjenilff et al using data from the National Health Interview Survey 1984-1992 (Kjerulff et al.,  
19 1996). Two online surveys conducted in 2009 and 2012 among the US women aged 18-49  
20 reported the prevalence of endometriosis to be 6.6%–10.8% (Bernuit et al., 2011) and 6.1%  
21 (Fuldeore & Soliman, 2017), respectively. However, the selected participants only represented  
22 74% of the target US population in the first study and neither study addressed selection bias due

1 to the nature of online surveys. Our prevalence was estimated from a nationally representative  
2 sample which is less subject to selection bias.

3 This study is the first to describe the national prevalence of endometriosis by different racial  
4 and ethnic groups in the US. Non-Hispanic white women had twice the prevalence compared to  
5 non-Hispanic black women. The prevalence estimate among Hispanic women in our study (2.7%)  
6 was lower than the reported 4% among Puerto Rican women (Flores et al., 2008). This may be  
7 due to different sampling methods (complex, multistage, probability sampling in ours vs  
8 convenient sampling in the latter) and different population characteristics (predominantly  
9 Mexican American women in ours vs Puerto Rican women in the latter).

10 Beyond confirming a higher prevalence of endometriosis among non-Hispanic white women  
11 compared with non-Hispanic Black and Hispanic women, our study makes a significant  
12 contribution by revealing, for the first time, the gaps in the age of endometriosis diagnosis across  
13 different racial and ethnic groups, potentially reflecting the racially and ethnically-related  
14 diagnostic biases of endometriosis. Different racial and ethnic groups may have different risks of  
15 developing endometriosis as suggested by a prospective cohort study (Missmer et al., 2004), and  
16 such difference could be due to genetic, lifestyle, and reproductive factors (Shafir et al., 2018).  
17 The association between socioeconomic factors and endometriosis may be more complex, as  
18 these factors may influence both endometriosis incidence and access to health care. An earlier  
19 diagnosis of endometriosis among those with health care access does not mean an earlier onset of  
20 endometriosis. Our findings, after conditioning on socioeconomic, lifestyle, and reproductive  
21 factors, demonstrated a 2.6 and 3.8 years' difference in the age of endometriosis diagnosis for  
22 black and Hispanic women relative to white women, respectively. This difference could be due  
23 to a true late onset of endometriosis among black and Hispanic women, different symptoms or

1 clinical presentations of endometriosis among these women, or potentially biases among health  
2 care providers making the diagnosis (Bougie, Healey, & Singh, 2019). Since we controlled for  
3 the most established risk factors of endometriosis (i.e., BMI, age of menarche, parity, birth  
4 control pills use), as well as socioeconomic factors (including health insurance as an indicator of  
5 health care access), we believe that the observed gap in the age of endometriosis diagnosis partly  
6 reflects race/ethnicity-associated diagnostic biases.

7 Endometriosis in women is associated with substantial negative health, developmental (e.g.,  
8 pursuing education and career choices, starting a family), occupational, and relational impact  
9 across the lifespan (Missmer et al., 2021), but many women experience significant delay in  
10 receiving the diagnosis. According to a recent online survey of women with endometriosis, more  
11 than half waited 6 or more years for the diagnosis of endometriosis while 54.3% experienced  
12 endometriosis-related pain daily (Lamvu, Antunez-Flores, Orady, & Schneider, 2020). The delay  
13 in the diagnosis has been reported to occur at both the individual patient level and the medical  
14 community level (Ballard, Lowton, & Wright, 2006). For example, it is very common for women  
15 to normalize and accommodate their menstrual pain which is usually the first symptom of  
16 endometriosis. At the medical level, there is a significant delay in referral from primary to  
17 secondary care which may be associated with pain normalized by family doctors. Intermittent  
18 hormonal suppression of symptoms as well as the use of nondiscriminatory diagnostic tools  
19 further contribute to the delay (Ballard et al., 2006). Relating to the discrepancy in the age of  
20 endometriosis diagnosis across different racial and ethnic groups found in our study, there could  
21 be a greater degree of normalization of menstrual symptoms among black and Hispanic women  
22 themselves as well as medical professionals in treating these patients. Additionally, due to the  
23 commonly held belief that endometriosis is less common among nonwhite women, providers

1 may be less likely to associate symptoms in black and Hispanic women with endometriosis, and  
2 therefore, less likely to make a timely and proper referral.

3       Limitations for the present study must be noted. First, we were not able to conclude  
4 definitely whether the observed differences in the age of endometriosis diagnosis were due to  
5 different disease/symptom onset or delay in diagnosis, although we controlled for common risk  
6 factors of endometriosis. Future research is needed to examine the duration from symptom onset  
7 to a confirmatory clinical diagnosis of endometriosis across various racial and ethnic groups to  
8 delineate the diagnostic disparity that could be avoided. Second, we were not able to ascertain  
9 the diagnostic method (e.g., histologically proven, surgical, clinical suspicion) and presenting  
10 symptoms (e.g., with or without pain, with or without infertility) of endometriosis. It is possible  
11 that black and Hispanic women were diagnosed with endometriosis by chance at older ages.  
12 Future research should identify and focus on the clinical meaningful phenotypes of  
13 endometriosis that are relevant to women of different racial and ethnic background. Third, for  
14 hormonal contraceptives, we only controlled for birth control pills use which was the only type  
15 of contraceptive that we were able to ascertain the length of use prior to the diagnosis of  
16 endometriosis, which may cause residual confounding. Fourth, we analyzed the NHANES 1999-  
17 2006 data. Over the years there has been an increasing awareness of endometriosis in the medical  
18 field and the society. More research is needed to determine whether the gap in the age of  
19 endometriosis diagnosis persists across different racial and ethnic groups, and if so, whether  
20 factors contributing to this diagnostic disparity change over time.

21

22 **Implications for Practice and/or Policy**

1 Clinicians should be aware that the historically held belief that endometriosis is rare among  
2 nonwhite women may be misleading and fueling an inherent race/ethnicity-related bias in  
3 making the diagnosis, thereby creating a diagnostic disparity across different racial and ethnic  
4 groups and exacerbating the delay in receiving appropriate care for black and Hispanic women.  
5 Primary care physicians should pay attention to the menstrual symptoms of black and Hispanic  
6 women, who may themselves normalize symptoms suggestive of underlying endometriosis, and  
7 make a timely referral for suspicious endometriosis. It is important to communicate to black and  
8 Hispanic patients that endometriosis can happen in all racial and ethnic groups, and severe  
9 menstrual and/or pelvic pain symptoms should not be normalized. Clinicians should also  
10 consider the possibility that women of different racial and ethnic background could have  
11 different symptoms and clinical presentations of endometriosis, and therefore, atypical symptoms  
12 should not rule out the diagnosis but warrant close examination. Finally, it is imperative to dispel  
13 the belief in the medical community that endometriosis is a white disease so that implicit racial  
14 biases in the diagnosis of endometriosis could be eliminated and treatment decisions are not  
15 influenced by such biases (Bougie, Healey, et al., 2019).

16

## 17 **Conclusions**

18 Self-reported endometriosis was prevalent in 9% of reproductive-aged US women between  
19 1999 and 2006. Black and Hispanic women had lower prevalence of endometriosis, and were  
20 diagnosed with endometriosis at later ages, compared with their white counterparts. This later  
21 diagnosis was observed after accounting for factors associated with the risk of and access to care  
22 for endometriosis, which potentially reflects the diagnostic biases related to race and ethnicity.

23

1 **References**

- 2 Agarwal, S. K., Chapron, C., Giudice, L. C., Laufer, M. R., Leyland, N., Missmer, S. A., . . .
- 3 Taylor, H. S. (2019). Clinical diagnosis of endometriosis: a call to action. *Am J Obstet*
- 4 *Gynecol*, 220(4), 354 e351-354 e312. doi:10.1016/j.ajog.2018.12.039
- 5 Ballard, K., Lowton, K., & Wright, J. (2006). What's the delay? A qualitative study of women's
- 6 experiences of reaching a diagnosis of endometriosis. *Fertil Steril*, 86(5), 1296-1301.
- 7 doi:10.1016/j.fertnstert.2006.04.054
- 8 Bernuit, D., Ebert, A. D., Halis, G., Strothmann, A., Gerlinger, C., Geppert, K., & Faustmann, T.
- 9 (2011). Female perspectives on endometriosis: findings from the uterine bleeding and
- 10 pain women's research study. *Journal of Endometriosis*, 3(2), 73-85.
- 11 doi:10.5301/je.2011.8525
- 12 Blinick, G., & Merendino, V. J. (1951). The infrequency of pelvic endometriosis in Negro
- 13 women. *The American Journal of Surgery*, 81(6), 635-636.
- 14 Bougie, O., Healey, J., & Singh, S. S. (2019). Behind the times: revisiting endometriosis and
- 15 race. *Am J Obstet Gynecol*, 221(1), 35 e31-35 e35. doi:10.1016/j.ajog.2019.01.238
- 16 Bougie, O., Yap, M. I., Sikora, L., Flaxman, T., & Singh, S. (2019). Influence of race/ethnicity
- 17 on prevalence and presentation of endometriosis: a systematic review and meta-analysis.
- 18 *BJOG: An International Journal of Obstetrics & Gynaecology*, 126(9), 1104-1115.
- 19 doi:10.1111/1471-0528.15692
- 20 Centers for Disease Control and Prevention (CDC). National Center for Health Statistics
- 21 (NCHS). National Health and Nutrition Examination Survey. Retrieved from
- 22 <https://www.cdc.gov/nchs/nhanes/index.htm>

- 1 Centers for Disease Control and Prevention (CDC). National Center for Health Statistics  
2 (NCHS). (2/21/2020). National Health and Nutrition Examination Survey. Module 3:  
3 Weighting. Retrieved from <https://www.cdc.gov/nchs/nhanes/tutorials/module3.aspx>
- 4 Chatman, D. L. (1976). Endometriosis in the black woman. *American journal of obstetrics and*  
5 *gynecology*, 125(7), 987-989.
- 6 Fiscella, K., & Williams, D. R. (2004). Health Disparities Based on Socioeconomic Inequities:  
7 Implications for Urban Health Care. *Academic Medicine*, 79(12), 1139-1147. Retrieved  
8 from  
9 [https://journals.lww.com/academicmedicine/Fulltext/2004/12000/Health\\_Disparities\\_Bas](https://journals.lww.com/academicmedicine/Fulltext/2004/12000/Health_Disparities_Based_on_Socioeconomic.4.aspx)  
10 [ed\\_on\\_Socioeconomic.4.aspx](https://journals.lww.com/academicmedicine/Fulltext/2004/12000/Health_Disparities_Based_on_Socioeconomic.4.aspx)
- 11 Flores, I., Abreu, S., Abac, S., Fourquet, J., Laboy, J., & Ríos-Bedoya, C. (2008). Self-reported  
12 prevalence of endometriosis and its symptoms among Puerto Rican women. *International*  
13 *journal of gynaecology and obstetrics: the official organ of the International Federation*  
14 *of Gynaecology and Obstetrics*, 100(3), 257-261. doi:10.1016/j.ijgo.2007.08.010
- 15 Fuldeore, M. J., & Soliman, A. M. (2017). Prevalence and Symptomatic Burden of Diagnosed  
16 Endometriosis in the United States: National Estimates from a Cross-Sectional Survey of  
17 59,411 Women. *Gynecol Obstet Invest*, 82(5), 453-461. doi:10.1159/000452660
- 18 Gibson, C., & Jung, K. (2005). *Historical census statistics on population totals by race, 1790 to*  
19 *1990, and by Hispanic origin, 1970 to 1990, for large cities and other urban places in the*  
20 *United States*: Citeseer.
- 21 Howard, F. M. (2009). Endometriosis and mechanisms of pelvic pain. *J Minim Invasive Gynecol*,  
22 *16(5)*, 540-550. doi:10.1016/j.jmig.2009.06.017



- 1 Hudelist, G., Fritzer, N., Thomas, A., Niehues, C., Oppelt, P., Haas, D., . . . Salzer, H. (2012).  
2 Diagnostic delay for endometriosis in Austria and Germany: causes and possible  
3 consequences. *Hum Reprod*, 27(12), 3412-3416. doi:10.1093/humrep/des316
- 4 Kjerulff, K. H., Erickson, B. A., & Langenberg, P. W. (1996). Chronic gynecological conditions  
5 reported by US women: findings from the National Health Interview Survey, 1984 to  
6 1992. *Am J Public Health*, 86(2), 195-199. doi:10.2105/ajph.86.2.195
- 7 Ko, M., Needleman, J., Derose, K. P., Laugesen, M. J., & Ponce, N. A. (2014). Residential  
8 segregation and the survival of U.S. urban public hospitals. *Med Care Res Rev*, 71(3),  
9 243-260. doi:10.1177/1077558713515079
- 10 Lamvu, G., Antunez-Flores, O., Orady, M., & Schneider, B. (2020). Path to diagnosis and  
11 women's perspectives on the impact of endometriosis pain. *Journal of Endometriosis and*  
12 *Pelvic Pain Disorders*, 12(1), 16-25. doi:10.1177/2284026520903214
- 13 Meigs, J. V. (1938). Endometriosis, a possible aetiological factor. *Surgery, Gynaecology and*  
14 *Obstetrics*, 67, 253.
- 15 Missmer, S. A., Hankinson, S. E., Spiegelman, D., Barbieri, R. L., Marshall, L. M., & Hunter, D.  
16 J. (2004). Incidence of laparoscopically confirmed endometriosis by demographic,  
17 anthropometric, and lifestyle factors. *Am J Epidemiol*, 160(8), 784-796.  
18 doi:10.1093/aje/kwh275
- 19 Missmer, S. A., Tu, F. F., Agarwal, S. K., Chapron, C., Soliman, A. M., Chiuve, S., . . . As-Sanie,  
20 S. (2021). Impact of Endometriosis on Life-Course Potential: A Narrative Review. *Int J*  
21 *Gen Med*, 14, 9-25. doi:10.2147/IJGM.S261139
- 22 Mowers, E. L., Lim, C. S., Skinner, B., Mahnert, N., Kamdar, N., Morgan, D. M., & As-Sanie, S.  
23 (2016). Prevalence of Endometriosis During Abdominal or Laparoscopic Hysterectomy

- 1 for Chronic Pelvic Pain. *Obstet Gynecol*, 127(6), 1045-1053.
- 2 doi:10.1097/AOG.0000000000001422
- 3 Nnoaham, K. E., Hummelshoj, L., Webster, P., d'Hooghe, T., de Cicco Nardone, F., de Cicco  
4 Nardone, C., . . . World Endometriosis Research Foundation Global Study of Women's  
5 Health, c. (2011). Impact of endometriosis on quality of life and work productivity: a  
6 multicenter study across ten countries. *Fertil Steril*, 96(2), 366-373 e368.  
7 doi:10.1016/j.fertnstert.2011.05.090
- 8 Scott, R. B., & Te Linde, R. W. (1950). External Endometriosis—The Scourage of the Private  
9 Patient. *Annals of surgery*, 131(5), 697.
- 10 Shafir, A. L., Farland, L. V., Shah, D. K., Harris, H. R., Kvaskoff, M., Zondervan, K., &  
11 Missmer, S. A. (2018). Risk for and consequences of endometriosis: A critical  
12 epidemiologic review. *Best Pract Res Clin Obstet Gynaecol*, 51, 1-15.  
13 doi:10.1016/j.bpobgyn.2018.06.001
- 14 Smith, D. B. (2005). Racial and ethnic health disparities and the unfinished civil rights agenda.  
15 *Health Aff (Millwood)*, 24(2), 317-324. doi:10.1377/hlthaff.24.2.317
- 16 Soliman, A. M., Fuldeore, M., & Snabes, M. C. (2017). Factors Associated with Time to  
17 Endometriosis Diagnosis in the United States. *J Womens Health (Larchmt)*, 26(7), 788-  
18 797. doi:10.1089/jwh.2016.6003
- 19 Soliman, A. M., Yang, H., Du, E. X., Kelley, C., & Winkel, C. (2016). The direct and indirect  
20 costs associated with endometriosis: a systematic literature review. *Human Reproduction*,  
21 31(4), 712-722. doi:10.1093/humrep/dev335
- 22 Staal, A. H., van der Zanden, M., & Nap, A. W. (2016). Diagnostic Delay of Endometriosis in  
23 the Netherlands. *Gynecol Obstet Invest*, 81(4), 321-324. doi:10.1159/000441911

- 1 U.S. Department of Health and Human Services. (2012). *Preventing Tobacco Use Among Youth*  
2 *and Young Adults: A Report of the Surgeon General*. Retrieved from Atlanta: U.S.  
3 Department of Health and Human Services, Centers for Disease Control and Prevention,  
4 National Center for Chronic Disease Prevention and Health Promotion, Office on  
5 Smoking and Health: [https://www.cdc.gov/tobacco/data\\_statistics/sgr/2012/index.htm](https://www.cdc.gov/tobacco/data_statistics/sgr/2012/index.htm)  
6 Welch, B. L. (1951). On the comparison of several mean values: an alternative approach.  
7 *Biometrika*, 38(3/4), 330-336.

8

9

1

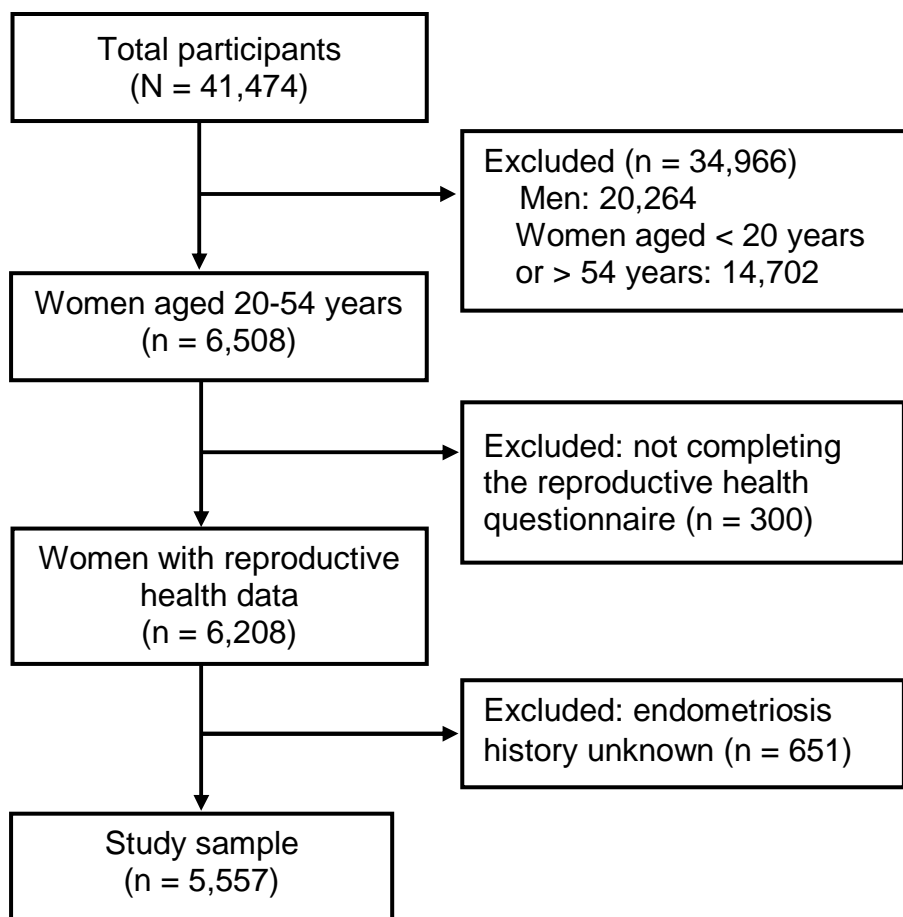

**Figure 1.** Flowchart for sample selection

2

3

- 1 **Table 1.** Prevalence of Self-reported Diagnosis of Endometriosis among US Women Aged 20-54
- 2 Years, Results from NHANES 1999-2006 (Unweighted n = 5,557)

|                           | <b>Unweighted</b> | <b>Unweighted</b>    | <b>Weighted</b>   |               |
|---------------------------|-------------------|----------------------|-------------------|---------------|
|                           | <b>total</b>      | <b>endometriosis</b> | <b>prevalence</b> | <b>95% CI</b> |
|                           | <b>n</b>          | <b>n</b>             | <b>(%)</b>        |               |
| 1999-2000                 | 1,325             | 84                   | 9.4               | 6.0-12.9      |
| 2001-2002                 | 1,486             | 108                  | 9.2               | 7.0-11.4      |
| 2003-2004                 | 1,275             | 84                   | 8.1               | 6.4-9.9       |
| 2005-2006                 | 1,471             | 104                  | 9.3               | 6.8-11.8      |
| Pooled 1999-2006          | 5,557             | 380                  | 9.0               | 7.9-10.2      |
| <i>Non-Hispanic White</i> | 2,568             | 261                  | 11.1              | 9.5-12.7      |
| <i>Non-Hispanic Black</i> | 1,151             | 67                   | 5.8               | 4.5-7.1       |
| <i>Hispanic</i>           | 1,585             | 37                   | 2.7               | 1.4-4.0       |
| <i>Others</i>             | 253               | 15                   | 6.4               | 3.1-9.7       |

CI = confidence interval; NHANES = National Health and Nutrition Examination Survey.

**Table 2.** Age of Endometriosis Diagnosis by Race/Ethnicity, Socioeconomic, Health Insurance, Lifestyle and Reproductive Characteristics (n = 375)

| <b>Characteristic</b>               | <b>N</b> | <b>Age of diagnosis:<br/>Mean (<math>\pm</math>SD)</b> | <b>p value<sup>a</sup></b> |
|-------------------------------------|----------|--------------------------------------------------------|----------------------------|
| Mean age of endometriosis diagnosis | 375      | 29.0 ( $\pm$ 8.1)                                      |                            |
| Race and ethnicity                  |          |                                                        | 0.126                      |
| Non-Hispanic White                  | 259      | 28.5 ( $\pm$ 7.9)                                      |                            |
| Non-Hispanic Black                  | 64       | 30.1 ( $\pm$ 8.7)                                      |                            |
| Hispanic                            | 37       | 31.2 ( $\pm$ 8.4)                                      |                            |
| Others                              | 15       | 27.3 ( $\pm$ 6.1)                                      |                            |
| Education level                     |          |                                                        | 0.281                      |
| Less than high school               | 47       | 29.1 ( $\pm$ 8.8)                                      |                            |
| High school diploma, GED            | 100      | 30.0 ( $\pm$ 7.5)                                      |                            |
| More than high school               | 228      | 28.5 ( $\pm$ 8.1)                                      |                            |
| Type of insurance                   |          |                                                        | 0.558                      |
| Private                             | 269      | 28.7 ( $\pm$ 7.8)                                      |                            |
| Public                              | 51       | 29.1 ( $\pm$ 9.2)                                      |                            |
| Uninsured                           | 55       | 30.0 ( $\pm$ 8.2)                                      |                            |
| Income-to-poverty ratio             |          |                                                        | 0.159                      |
| <1.00                               | 49       | 30.1 ( $\pm$ 8.2)                                      |                            |
| 1.00-1.99                           | 61       | 29.1 ( $\pm$ 8.9)                                      |                            |
| 2.00-4.99                           | 159      | 27.9 ( $\pm$ 7.7)                                      |                            |

|                                                                          |     |                    |                     |
|--------------------------------------------------------------------------|-----|--------------------|---------------------|
| 5.00-highest                                                             | 93  | 29.9 ( $\pm 8.0$ ) |                     |
| Smoked regularly before age 18                                           |     |                    | 0.314               |
| Yes                                                                      | 90  | 28.2 ( $\pm 7.3$ ) |                     |
| No                                                                       | 285 | 29.2 ( $\pm 8.3$ ) |                     |
| Highest BMI not including pregnancy: kg/m <sup>2</sup>                   |     |                    | 0.475               |
| < 25                                                                     | 105 | 28.2 ( $\pm 7.6$ ) |                     |
| 25–29.9                                                                  | 104 | 29.0 ( $\pm 8.1$ ) |                     |
| $\geq 30$                                                                | 160 | 29.5 ( $\pm 8.3$ ) |                     |
| Age of menarche (years)                                                  |     |                    | 0.091               |
| 8-11                                                                     | 98  | 28.0 ( $\pm 8.3$ ) |                     |
| 12-13                                                                    | 198 | 28.7 ( $\pm 8.0$ ) |                     |
| 14-17                                                                    | 74  | 30.6 ( $\pm 7.6$ ) |                     |
| Parous prior to the diagnosis of endometriosis                           |     |                    | <.0001              |
| Yes                                                                      | 191 | 32.6 ( $\pm 7.2$ ) |                     |
| No                                                                       | 184 | 25.2 ( $\pm 7.2$ ) |                     |
| Years of birth control pills use prior to the diagnosis of endometriosis |     |                    | <.0001 <sup>b</sup> |
| None                                                                     | 128 | 26.4 ( $\pm 8.2$ ) |                     |
| < 5 years                                                                | 114 | 28.1 ( $\pm 8.1$ ) |                     |
| $\geq 5$ years                                                           | 131 | 32.2 ( $\pm 6.8$ ) |                     |

---

GED = General Educational Diploma; BMI = body mass index; SE = standard errors.

<sup>a</sup> Means were compared using the analysis of variance (ANOVA).

<sup>b</sup> Welch's ANOVA was used due to the violation of homogeneity of variance.

1 **Table 3.** Multivariable Generalized Linear Regression Modeling of the Association between  
 2 Race/Ethnicity and Age of Endometriosis Diagnosis (n = 351)

| Predictors                                             | Beta coefficient | 95% CI        | p value |
|--------------------------------------------------------|------------------|---------------|---------|
| Race/Ethnicity                                         |                  |               | .002    |
| Non-Hispanic white                                     | Ref              | Ref           |         |
| Non-Hispanic black                                     | 2.62             | 0.64-4.60     |         |
| Hispanic                                               | 3.85             | 1.48-6.21     |         |
| Other groups combined                                  | -1.04            | -4.57 to 2.50 |         |
| Education level                                        |                  |               | .669    |
| Less than high school                                  | Ref              | Ref           |         |
| High school diploma, GED                               | 1.05             | -1.41 to 3.50 |         |
| More than high school                                  | 0.48             | -1.82 to 2.78 |         |
| Family income to poverty ratio                         | 0.59             | 0.04-1.13     | .035    |
| Type of insurance                                      |                  |               | .188    |
| Private                                                | Ref              | Ref           |         |
| Public                                                 | 1.17             | -1.20 to 3.54 |         |
| Uninsured                                              | 2.08             | -0.20 to 4.36 |         |
| Smoked regularly before age 18                         | -1.16            | -2.84 to 0.53 | .178    |
| Highest BMI not including pregnancy: kg/m <sup>2</sup> |                  |               | .715    |
| < 25                                                   | Ref              | Ref           |         |
| 25–29.9                                                | 0.74             | -1.08 to 2.56 |         |
| ≥ 30                                                   | 0.51             | -1.22 to 2.24 |         |



---

|                                                                          |      |               |        |
|--------------------------------------------------------------------------|------|---------------|--------|
| Age of menarche (years)                                                  | 0.31 | -0.09 to 0.72 | .125   |
| Parous: yes vs no                                                        | 7.01 | 5.50-8.52     | <.0001 |
| Years of birth control pills use prior to the diagnosis of endometriosis | 0.49 | 0.35-0.62     | <.0001 |

---

GED = General Educational Diploma; BMI = body mass index; CI = confidence interval.
